# Supplementary material for: Assessing COVID-19 Vaccine Booster Hesitancy Using the Modified 5C Scale in Zhejiang Province, China: A Cross-Sectional Study
Source: MDPI journal article supplement (doi:10.3390/vaccines11030706), 2023-03-21
Supplement: s1 [file s1]

**Supplementary Table S1.** The modified 5C scale

**Strongly agree=1, agree=2, not sure=3, disagree=4 or strongly disagree=5**

| COVID-19 Booster Vaccine Hesitancy Scale Items                                                                                                             | 1 | 2 | 3 | 4 | 5 |
|------------------------------------------------------------------------------------------------------------------------------------------------------------|---|---|---|---|---|
| <b>Dimension 1: Confidence</b>                                                                                                                             |   |   |   |   |   |
| 1. COVID-19 booster vaccines are safe.                                                                                                                     |   |   |   |   |   |
| 2. COVID-19 booster vaccines are effective.                                                                                                                |   |   |   |   |   |
| 3. Regarding the booster campaign initiated by government, I am confident that public authorities decide in the best interest of the community.            |   |   |   |   |   |
| <b>Dimension 2: Complacency</b>                                                                                                                            |   |   |   |   |   |
| 4. The booster is unnecessary because the government takes strict prevention and control measures against COVID-19 which is not prevalent in China so far. |   |   |   |   |   |
| 5. My immune system is so strong, it can protect me against COVID-19.                                                                                      |   |   |   |   |   |
| 6. The COVID-19 is not so severe that I should get the booster.                                                                                            |   |   |   |   |   |
| <b>Dimension 3: Constraint</b>                                                                                                                             |   |   |   |   |   |
| 7. Everyday stress prevents me from getting the booster.                                                                                                   |   |   |   |   |   |
| 8. For me, it is inconvenient to receive the booster.                                                                                                      |   |   |   |   |   |
| 9. Primary vaccination experience was not good which makes me feel unwilling to get the booster.                                                           |   |   |   |   |   |
| <b>Dimension 4: Calculation</b>                                                                                                                            |   |   |   |   |   |
| 10. When I think about getting the booster, I weigh benefits and risks to make the best decision possible.                                                 |   |   |   |   |   |
| 11. For each vaccination, I closely consider whether it is useful for me.                                                                                  |   |   |   |   |   |
| 12. It is important for me to fully understand relative messages about the booster vaccination before I get vaccinated.                                    |   |   |   |   |   |
| <b>Dimension 5: Collective Responsibility</b>                                                                                                              |   |   |   |   |   |
| 13. I get vaccinated because I can protect people with a weaker immune system.                                                                             |   |   |   |   |   |
| 14. Vaccination is a collective action to prevent the spread of COVID-19.                                                                                  |   |   |   |   |   |

**Supplementary Table S2.** The complete 30-item questionnaire for formal investigation

**Section I: General Information.**

|                                                                                    |                                                                           |           |                      |
|------------------------------------------------------------------------------------|---------------------------------------------------------------------------|-----------|----------------------|
| 15. The gender                                                                     | A. Male                                                                   | B. Female | C. Prefer not to say |
| 16. How old are you (Years old)?                                                   | A. <18 B. 18-30 C. 31-40 D. 41-50 E. 51-60 F. >=60                        |           |                      |
| 17. What's your residence?                                                         | _____City_____District/County                                             |           |                      |
| 18. Your residence belong to?                                                      | A. Urban                                                                  | B. Rural  |                      |
| 19. What is your highest degree of education level (including current enrollment)? | A. Middle school and below B. High school C. Bachelor D. Master and above |           |                      |
| 20. What is your marital status?                                                   |                                                                           |           |                      |

|                                                                                                                                                                                                                                                                         |
|-------------------------------------------------------------------------------------------------------------------------------------------------------------------------------------------------------------------------------------------------------------------------|
| A. Married    B. Unmarried    C. Divorced    D. Death of a spouse                                                                                                                                                                                                       |
| 21. What is your annual income (Yuan/RMB)?<br>A. Below ¥50k    B. ¥50k-100k    C. ¥100k-150k    D. ¥150k-200k    E. ¥200k and above                                                                                                                                     |
| 22. What is your occupation type?<br>A. Civil servant and technical personnel<br>B. Medical worker<br>C. Manufacturing and commercial worker<br>D. Public service worker<br>E. Farmer/Herder/Fisherman<br>F. Unemployed/Retiree<br>G. College student<br>H. Others_____ |

**Section II: Information on primary doses against COVID-19.**

**Please check through “Zheliban” app developed by the General Office of the People’s Government of Zhejiang Province or “Alipay” app developed by Alipay Technology.**

|                                                                                                                                                                                  |
|----------------------------------------------------------------------------------------------------------------------------------------------------------------------------------|
| 23. Have you completed the primary doses against COVID-19 yet?<br>A. Yes            B. No            C. Not sure.                                                                |
| 24. What is your vaccine type of your primary doses?<br>B. Inactivated (Sinovac)<br>C. Inactivated (Sinopharm)<br>D. Viral vector<br>E. Protein subunit<br>F. mRNA<br>G. Unclear |

**Section III: Booster hesitancy with the modified 5C scale.**

**Strongly agree=1, agree=2, not sure=3, disagree=4 or strongly disagree=5**

| COVID-19 Booster Vaccine Hesitancy Scale Items                                                                                                              | 1 | 2 | 3 | 4 | 5 |
|-------------------------------------------------------------------------------------------------------------------------------------------------------------|---|---|---|---|---|
| 25. COVID-19 booster vaccines are safe.                                                                                                                     |   |   |   |   |   |
| 26. COVID-19 booster vaccines are effective.                                                                                                                |   |   |   |   |   |
| 27. Regarding the booster campaign initiated by government, I am confident that public authorities decide in the best interest of the community.            |   |   |   |   |   |
| 28. The booster is unnecessary because the government takes strict prevention and control measures against COVID-19 which is not prevalent in China so far. |   |   |   |   |   |
| 29. My immune system is so strong, it can protect me against COVID-19.                                                                                      |   |   |   |   |   |
| 30. The COVID-19 is not so severe that I should get the booster.                                                                                            |   |   |   |   |   |
| 31. Everyday stress prevents me from getting the booster.                                                                                                   |   |   |   |   |   |
| 32. For me, it is inconvenient to receive the booster.                                                                                                      |   |   |   |   |   |
| 33. Primary vaccination experience was not good which makes me feel unwilling to get the booster.                                                           |   |   |   |   |   |
| 34. When I think about getting the booster, I weigh benefits and risks to make the best decision possible.                                                  |   |   |   |   |   |

| COVID-19 Booster Vaccine Hesitancy Scale Items                                                                          | 1 | 2 | 3 | 4 | 5 |
|-------------------------------------------------------------------------------------------------------------------------|---|---|---|---|---|
| 35. For each vaccination, I closely consider whether it is useful for me.                                               |   |   |   |   |   |
| 36. It is important for me to fully understand relative messages about the booster vaccination before I get vaccinated. |   |   |   |   |   |
| 37. I get vaccinated because I can protect people with a weaker immune system.                                          |   |   |   |   |   |
| 38. Vaccination is a collective action to prevent the spread of COVID-19.                                               |   |   |   |   |   |

#### Section IV: Booster willingness.

|                                                                                                                                                                                                                                                                                                                                                                                                                                                                                                                                                                                                                                                                                                                                                                                                                                                                                                                                                                                                           |
|-----------------------------------------------------------------------------------------------------------------------------------------------------------------------------------------------------------------------------------------------------------------------------------------------------------------------------------------------------------------------------------------------------------------------------------------------------------------------------------------------------------------------------------------------------------------------------------------------------------------------------------------------------------------------------------------------------------------------------------------------------------------------------------------------------------------------------------------------------------------------------------------------------------------------------------------------------------------------------------------------------------|
| <p>39. Are you willing to receive the booster dose of COVID-19 vaccines?</p> <p>A. Definitely go to get vaccinated.</p> <p>B. Likely to get vaccinated.</p> <p>C. Not sure</p> <p>D. Unlikely to get vaccinated.</p> <p>E. Definitely not to get vaccinated.</p>                                                                                                                                                                                                                                                                                                                                                                                                                                                                                                                                                                                                                                                                                                                                          |
| <p>40. What are your reasons if you would like to get the booster (<b>Multiple choice, only for those choose A, B in Question 24</b>)?</p> <p>A. So far, two-dose series of primary doses might not provide sufficient protection.</p> <p>B. I am immunocompromised or have underlying diseases who need the booster to enhance protection.</p> <p>C. The booster is safe which I want to get to enhance protection.</p> <p>D. Get the booster can make me feel safer.</p> <p>E. Get the booster make my daily activities (work and life) more convenient.</p> <p>F. Get the booster can also protect others, which contributes to herd immunity.</p> <p>G. Booster is required/encouraged by community or government.</p> <p>H. Good previous vaccination experience for primary doses against COVID-19.</p> <p>I. Impact of people around or recommended by professionals (medical staff, medical experts, etc).</p> <p>J. Other reasons_____</p>                                                       |
| <p>41. What are your reasons if you would <b>not</b> like to get the booster (<b>Multiple choice, only for those choose C, D, and E in Question 24</b>)?</p> <p>A. The risk of infection is low in China right now.</p> <p>B. The disease severity caused by COVID-19 is largely decreasing.</p> <p>C. Two-dose series in primary vaccination is sufficient to provide protection.</p> <p>D. There is no need for me to get vaccinated if other people have gotten the booster.</p> <p>E. Safety concern about the booster.</p> <p>F. Underlying physical conditions which are not suitable for the booster.</p> <p>G. Not good experience on primary vaccination.</p> <p>H. The rate of adverse effect is uncertain.</p> <p>I. Inadequate health promoting materials on the booster for me.</p> <p>J. Not encouraged or recommended by people around me.</p> <p>K. It's troublesome and inconvenient for me the get the booster.</p> <p>L. Too busy to get the booster.</p> <p>M. Other reasons_____</p> |

#### Section V: Previous experience on primary doses.

|                                                                                                                                    |
|------------------------------------------------------------------------------------------------------------------------------------|
| 42. How do you feel about your vaccination experience of primary doses against COVID-19?                                           |
| A. Very satisfied                                                                                                                  |
| B. Satisfied                                                                                                                       |
| C. Not sure                                                                                                                        |
| D. Disappoint                                                                                                                      |
| E. Very disappoint                                                                                                                 |
| 43. What are your reasons if your experience is good ( <b>Multiple choice, only for those choose A, B and C in Question 27</b> )?  |
| A. Good medical skills during vaccination.                                                                                         |
| B. The environment of vaccination site is quiet and hygienic, which makes me feel safe.                                            |
| C. Convenient and high accessibility to get vaccinated.                                                                            |
| D. The process of getting vaccinated is clear and reasonable, and the queue is orderly.                                            |
| E. No adverse effect after the primary doses.                                                                                      |
| F. My daily activities are convenient after vaccination.                                                                           |
| G. Other reasons_____                                                                                                              |
| 44. What are your reasons if your experience is not good ( <b>Multiple choice, only for those choose D and E in Question 27</b> )? |
| A. Not good medical skills during vaccination.                                                                                     |
| B. Not good environment of vaccination site, which is crowed/noisy/unhygienic/sweltering, and so on.                               |
| C. I have adverse reaction after injection.                                                                                        |
| D. Strong recommendation for vaccination by communities or government is troublesome.                                              |
| E. Unintelligent online appointment of vaccination.                                                                                |
| F. Long waits.                                                                                                                     |
| G. Vaccine shortage.                                                                                                               |
| H. Inconvenient to get vaccinated due to daily restrictions.                                                                       |
| I. Other reasons_____                                                                                                              |

**Supplementary Table S3.** Pairwise comparisons based on *Bonferroni correction* method between booster hesitancy and various significant factors in univariate analysis.

| Item                                | Pairwise comparison groups |          | Pairwise hesitancy rate (%)<br>for each group |             | <i>P.adj</i> * |
|-------------------------------------|----------------------------|----------|-----------------------------------------------|-------------|----------------|
| <i>Demographic characteristics</i>  |                            |          |                                               |             |                |
| <b>Age (Years)</b>                  |                            |          |                                               |             |                |
|                                     | 31-40                      | 61-      | 133 (12.41)                                   | 88 (18.22)  | 0.028          |
| <b>Educational status</b>           |                            |          |                                               |             |                |
|                                     | Middle school<br>and below | Bachelor | 136 (18.63)                                   | 338 (13.57) | 0.005          |
| <b>Annual income<br/>(Yuan/RMB)</b> |                            |          |                                               |             |                |

|                                                                        |                                       |                                     |             |             |        |
|------------------------------------------------------------------------|---------------------------------------|-------------------------------------|-------------|-------------|--------|
|                                                                        | <50,000                               | 100,001-150,000                     | 289 (17.74) | 89 (10.93)  | <0.001 |
|                                                                        | <50,000                               | 150,001-200,000                     | 289 (17.74) | 32 (11.03)  | 0.047  |
| <b>Marital status</b>                                                  |                                       |                                     |             |             |        |
|                                                                        | Married                               | Single                              | 316 (13.41) | 259 (16.71) | 0.005  |
|                                                                        | Married                               | Widowed                             | 316 (13.41) | 40 (76.92)  | <0.001 |
|                                                                        | Single                                | Widowed                             | 259 (16.71) | 40 (76.92)  | <0.001 |
|                                                                        | Divorced                              | Widowed                             | 13 (16.25)  | 40 (76.92)  | <0.001 |
| <b>Occupation</b>                                                      |                                       |                                     |             |             |        |
|                                                                        | Civil servant and technical personnel | Unemployed/Retiree                  | 149 (11.93) | 54 (19.35)  | 0.047  |
|                                                                        | Civil servant and technical personnel | College student                     | 149 (11.93) | 166 (19.67) | <0.001 |
|                                                                        | Medical worker                        | Manufacturing and commercial worker | 51 (9.04)   | 90 (16.61)  | 0.006  |
|                                                                        | Medical worker                        | Unemployed/Retiree                  | 51 (9.04)   | 54 (19.35)  | <0.001 |
|                                                                        | Medical worker                        | College student                     | 51 (9.04)   | 166 (19.67) | <0.001 |
| <b>Vaccine Type</b>                                                    |                                       |                                     |             |             |        |
| <b>Brand of primary Covid-19 doses</b>                                 |                                       |                                     |             |             |        |
|                                                                        | Inactivated (Sinovac)                 | Inactivated (Sinopharm)             | 403 (13.75) | 159 (18.32) | 0.006  |
| <b>Previous vaccination experience level of primary Covid-19 doses</b> |                                       |                                     |             |             |        |
|                                                                        | Very satisfied                        | Satisfied                           | 63 (3.60)   | 254 (14.40) | <0.001 |
|                                                                        | Very satisfied                        | Not sure                            | 63 (3.60)   | 238 (52.89) | <0.001 |
|                                                                        | Very satisfied                        | Disappoint                          | 63 (3.60)   | 32 (55.17)  | <0.001 |
|                                                                        | Very satisfied                        | Very disappoint                     | 63 (3.60)   | 11 (64.71)  | <0.001 |
|                                                                        | Satisfied                             | Not sure                            | 254 (14.40) | 238 (52.89) | <0.001 |
|                                                                        | Satisfied                             | Disappoint                          | 254 (14.40) | 32 (55.17)  | <0.001 |
|                                                                        | Satisfied                             | Very disappoint                     | 254 (14.40) | 11 (64.71)  | <0.001 |
| <b>5C scale dimensions</b>                                             |                                       |                                     |             |             |        |
| <b>Confidence</b>                                                      |                                       |                                     |             |             |        |
|                                                                        | High                                  | Middle                              | 471 (12.15) | 116 (80.00) | <0.001 |
|                                                                        | High                                  | Low                                 | 471 (12.15) | 11 (68.75)  | <0.001 |
| <b>Complacency</b>                                                     |                                       |                                     |             |             |        |
|                                                                        | High                                  | Middle                              | 135 (25.91) | 170 (43.26) | <0.001 |
|                                                                        | High                                  | Low                                 | 135 (25.91) | 293 (9.38)  | <0.001 |

|                                  |        |        |             |             |        |
|----------------------------------|--------|--------|-------------|-------------|--------|
| <b>Constraint</b>                | Middle | Low    | 170 (43.26) | 293 (9.38)  | <0.001 |
|                                  | High   | Low    | 142 (39.78) | 280 (8.66)  | <0.001 |
|                                  | Middle | Low    | 176 (39.20) | 280 (8.66)  | <0.001 |
| <b>Calculation</b>               |        |        |             |             |        |
|                                  | High   | Middle | 441 (14.18) | 134 (28.03) | <0.001 |
|                                  | High   | Low    | 441 (14.18) | 23 (5.10)   | <0.001 |
|                                  | Middle | Low    | 134 (28.03) | 23 (5.10)   | <0.001 |
| <b>Collective responsibility</b> |        |        |             |             |        |
|                                  | High   | Middle | 352 (10.46) | 216 (38.50) | <0.001 |
|                                  | High   | Low    | 352 (10.46) | 30 (26.79)  | <0.001 |
|                                  | Middle | Low    | 216 (38.50) | 30 (26.79)  | 0.018  |

---

Note: \* *P* value was adjusted based on the *Bonferroni correction* method.
